# Supplementary material
Source: ML conference proceedings conference paper supplement (https://openaccess.thecvf.com/content/CVPR2025/html/del_Rio_Data_Distributional_Properties_CVPR_2025_paper.html)
Supplement: Supplementary file 1 [file del_Rio_Data_Distributional_Properties_CVPR_2025_supplemental.pdf]

# Data Distributional Properties As Inductive Bias for Systematic Generalization

## Supplementary Material

### 11. Hyper Parameters

Images were resized to  $224 \times 224$  pixels, and divided into patches of  $16 \times 16$  pixels before being fed to the model. In the text, a masked language modeling (MLM) probability of 0.15 was used to randomly mask text tokens before feeding them to the model.

The model used during our experiments is a Transformer [75] with a hidden layer dimension of 256, with 4 transformer layers and 4 attention heads. Training was carried out using the Adam optimizer [40] with a learning rate of  $1 \times 10^{-4}$ , a batch size of 256 and for 1000 epochs.

### 12. Dataset Samples

Below we display samples composed of images and their corresponding textual descriptions from the datasets described in Section 3.1:

#### Sample 1

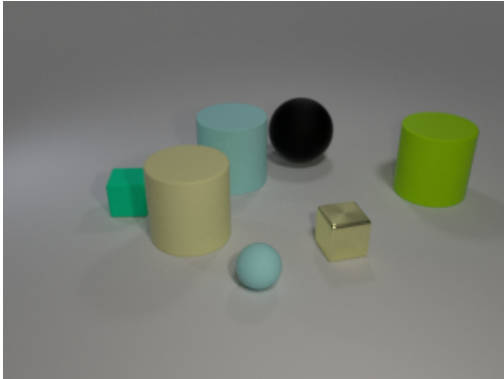

#### Textual Description

```
small #00ff80 rubber cube [SEP] large  
#ffff80 rubber cylinder [SEP] large #80ffff  
rubber cylinder [SEP] small #ffff80 metal  
cube [SEP] large #000000 rubber sphere  
[SEP] small #80ffff rubber sphere [SEP]  
large #80ff00 rubber cylinder
```

#### Sample 2

#### Textual Description

```
large #005500 rubber cylinder [SEP] large  
#5555aa metal cube [SEP] large #ff55aa  
rubber cube [SEP] small #ffff55 rubber  
sphere [SEP] large #aa00ff rubber sphere  
[SEP] large #00ff55 metal sphere
```

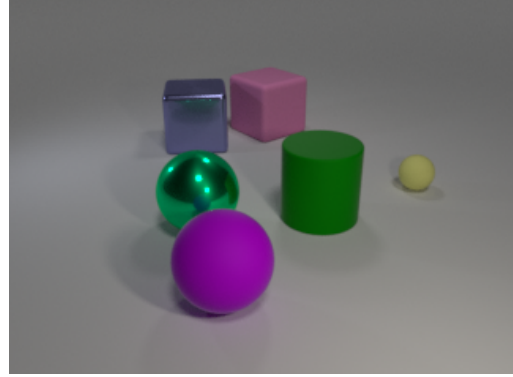

#### Sample 3

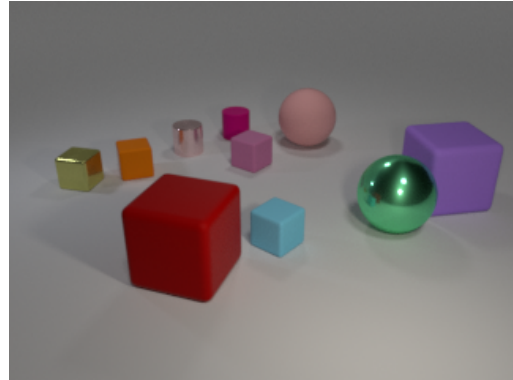

#### Textual Description

```
small #bf0040 rubber cylinder [SEP] large  
#40ff80 metal sphere [SEP] large #8040ff  
rubber cube [SEP] large #800000 rubber cube  
[SEP] small #bf4080 rubber cube [SEP] small  
#ffbfbf metal cylinder [SEP] small #ff4000  
rubber cube [SEP] small #40bfff rubber cube  
[SEP] small #bfbf40 metal cube [SEP] large  
#ff8080 rubber sphere
```

### 13. Correlation between P-Score and OOD Performance

In Table 1 we show the Pearson correlation between different p-scores obtained for a model and their OOD performance on the shape task. Parallelism in the representations seems to strongly correlate with better OOD performance, suggesting that parallelism may be the property that is inducing SG in the models.

| METRIC  | AVG       | DIV       | BURST    | LI        |
|---------|-----------|-----------|----------|-----------|
| CORR    | 0.73      | 0.76      | 0.69     | 0.73      |
| P-VALUE | $1.88e-9$ | $7.17e-4$ | $5.5e-3$ | $3.45e-5$ |

Table 1. Pearson Correlation between P-Scores and OOD performance on the *shape* task broken down per training data property. DIV: Diversity, BURST: Burstiness, LI: Latent Intervention.

## 14. Detailed Experimental Results

In tables 2, 3, 4, 5, 6, and 7, we exposed the values obtained that were used to generate most of the figures in the work above. Table 2 shows the data used for Figure 2. Table 3 for Figure 3. Table 4 for Figure 4. Table 5 for Figure 6. Table 6 for Figure 5. And, Table 7 for Figure 7.

|           | Train             | Test-ID          | Test-OOD         |
|-----------|-------------------|------------------|------------------|
| Color     | $94.3 \pm 0.0\%$  | $94.1 \pm 0.1\%$ | $50.5 \pm 1.1\%$ |
| Shapes    | $100.0 \pm 0.0\%$ | $99.6 \pm 0.0\%$ | $0.6 \pm 0.1\%$  |
| Materials | $98.0 \pm 0.0\%$  | $96.9 \pm 0.0\%$ | $87.8 \pm 0.9\%$ |
| Size      | $98.1 \pm 0.0\%$  | $98.0 \pm 0.0\%$ | $91.2 \pm 1.0\%$ |

Table 2. Table displaying values to form Figure 2. Accuracy for predicting different properties for different data splits for the baseline model (8 colors). ID performance for all tasks remains high, however OOD performance plummets for shape and color, suggesting the model is learning combinations of shape-color as features, instead of achieving SG. Unexpectedly, material and size also show a drop in OOD performance, even though the model has been exposed to all combinations of these attributes in training.

| Train Fract. | Color            |                  | Shape            |                  |
|--------------|------------------|------------------|------------------|------------------|
|              | Test-ID          | Test-OOD         | Test-ID          | Test-OOD         |
| 8 Colors     |                  |                  |                  |                  |
| 1/8          | $91.5 \pm 0.1\%$ | $47.4 \pm 0.4\%$ | $97.1 \pm 0.1\%$ | $2.1 \pm 0.1\%$  |
| 1/4          | $93.1 \pm 0.1\%$ | $47.4 \pm 0.5\%$ | $99.0 \pm 0.0\%$ | $1.2 \pm 0.1\%$  |
| 1/2          | $93.9 \pm 0.0\%$ | $47.3 \pm 0.6\%$ | $99.2 \pm 0.0\%$ | $0.6 \pm 0.1\%$  |
| 1/1          | $94.1 \pm 0.1\%$ | $50.5 \pm 1.1\%$ | $99.6 \pm 0.0\%$ | $0.6 \pm 0.1\%$  |
| 216 Colors   |                  |                  |                  |                  |
| 1/8          | $22.8 \pm 2.4\%$ | $5.0 \pm 0.9\%$  | $45.1 \pm 0.6\%$ | $43.3 \pm 0.5\%$ |
| 1/4          | $79.6 \pm 0.6\%$ | $60.4 \pm 1.3\%$ | $89.1 \pm 0.5\%$ | $81.0 \pm 0.8\%$ |
| 1/2          | $86.1 \pm 0.0\%$ | $74.1 \pm 0.4\%$ | $94.4 \pm 0.1\%$ | $88.4 \pm 0.2\%$ |
| 1/1          | $88.1 \pm 0.1\%$ | $77.9 \pm 0.4\%$ | $96.3 \pm 0.0\%$ | $90.0 \pm 0.4\%$ |

Table 3. Table displaying values to form Figure 3. Accuracy for the *shape* task for different amounts of training data for the baseline model (8 colors) vs model trained on 216 colors. (a) Increasing dataset size does not increase OOD performance but rather degrades it slightly. (b) With increased *diversity* much stronger OOD generalization is achieved, with models trained on only a quarter of the data severely outperforming the 8-color baseline.

| Num.<br>Colors | Color           |                 | Shape           |                 | Size            |                 | Material        |                 |
|----------------|-----------------|-----------------|-----------------|-----------------|-----------------|-----------------|-----------------|-----------------|
|                | Test-ID         | Test-OOD        | Test-ID         | Test-OOD        | Test-ID         | Test-OOD        | Test-ID         | Test-OOD        |
| 8              | 94.1 $\pm$ 0.1% | 50.5 $\pm$ 1.1% | 99.6 $\pm$ 0.0% | 0.6 $\pm$ 0.1%  | 98.0 $\pm$ 0.0% | 91.2 $\pm$ 1.0% | 96.9 $\pm$ 0.0% | 87.8 $\pm$ 0.9% |
| 27             | 91.7 $\pm$ 0.0% | 67.5 $\pm$ 0.7% | 96.9 $\pm$ 0.1% | 1.5 $\pm$ 0.1%  | 99.5 $\pm$ 0.0% | 97.6 $\pm$ 0.0% | 98.6 $\pm$ 0.0% | 96.7 $\pm$ 0.1% |
| 64             | 90.8 $\pm$ 0.1% | 73.0 $\pm$ 0.5% | 96.9 $\pm$ 0.0% | 48.5 $\pm$ 0.6% | 99.7 $\pm$ 0.0% | 97.6 $\pm$ 0.0% | 99.2 $\pm$ 0.0% | 96.8 $\pm$ 0.0% |
| 125            | 89.0 $\pm$ 0.1% | 67.0 $\pm$ 0.3% | 96.1 $\pm$ 0.1% | 81.8 $\pm$ 0.6% | 99.8 $\pm$ 0.0% | 97.8 $\pm$ 0.0% | 99.2 $\pm$ 0.0% | 96.9 $\pm$ 0.0% |
| 216            | 88.1 $\pm$ 0.1% | 77.9 $\pm$ 0.4% | 96.3 $\pm$ 0.0% | 90.0 $\pm$ 0.4% | 99.8 $\pm$ 0.0% | 97.7 $\pm$ 0.0% | 99.3 $\pm$ 0.0% | 97.2 $\pm$ 0.0% |

Table 4. Table displaying values to form Figure 4. Accuracy versus the number of colors in  $\mathcal{D}_{train}$  for  $\mathcal{D}_{test-ID}$  and  $\mathcal{D}_{test-OOD}$  for all tasks. Performance for the *shape* task increases drastically for the OOD split as we increase colors, increasing 86% in absolute terms over the 8-color baseline. Moreover, performance in the color task also tends to increase in the OOD split, while ID only suffers slightly, even though the task becomes significantly harder. Remarkably, the *material* and *size* task rapidly increase their  $\mathcal{D}_{test-OOD}$  performance as color increases.

| Num.<br>Colors | P<br>Bursty | Color           |                 | Shape           |                 | Size            |                 | Material        |                 |
|----------------|-------------|-----------------|-----------------|-----------------|-----------------|-----------------|-----------------|-----------------|-----------------|
|                |             | Test-ID         | Test-OOD        | Test-ID         | Test-OOD        | Test-ID         | Test-OOD        | Test-ID         | Test-OOD        |
| 8              | 0.0         | 94.1 $\pm$ 0.1% | 50.5 $\pm$ 1.1% | 99.6 $\pm$ 0.0% | 0.6 $\pm$ 0.1%  | 98.0 $\pm$ 0.0% | 91.2 $\pm$ 1.0% | 96.9 $\pm$ 0.0% | 87.8 $\pm$ 0.9% |
|                | 0.5         | 94.2 $\pm$ 0.0% | 48.9 $\pm$ 0.9% | 99.6 $\pm$ 0.0% | 0.9 $\pm$ 0.2%  | 99.5 $\pm$ 0.0% | 97.6 $\pm$ 0.0% | 98.6 $\pm$ 0.0% | 96.7 $\pm$ 0.1% |
|                | 1.0         | 93.8 $\pm$ 0.0% | 47.3 $\pm$ 0.1% | 99.4 $\pm$ 0.0% | 0.5 $\pm$ 0.0%  | 99.7 $\pm$ 0.0% | 97.6 $\pm$ 0.0% | 99.2 $\pm$ 0.0% | 96.8 $\pm$ 0.0% |
| 27             | 0.0         | 91.7 $\pm$ 0.0% | 67.5 $\pm$ 0.7% | 96.9 $\pm$ 0.1% | 1.5 $\pm$ 0.1%  | 98.0 $\pm$ 0.0% | 91.2 $\pm$ 1.0% | 96.9 $\pm$ 0.0% | 87.8 $\pm$ 0.9% |
|                | 0.5         | 91.7 $\pm$ 0.0% | 71.9 $\pm$ 0.2% | 97.1 $\pm$ 0.0% | 1.8 $\pm$ 0.3%  | 99.5 $\pm$ 0.0% | 97.6 $\pm$ 0.0% | 98.6 $\pm$ 0.0% | 96.7 $\pm$ 0.1% |
|                | 1.0         | 90.3 $\pm$ 0.0% | 65.2 $\pm$ 0.8% | 96.9 $\pm$ 0.0% | 4.7 $\pm$ 0.4%  | 99.7 $\pm$ 0.0% | 97.6 $\pm$ 0.0% | 99.2 $\pm$ 0.0% | 96.8 $\pm$ 0.0% |
| 64             | 0.0         | 90.8 $\pm$ 0.1% | 73.0 $\pm$ 0.5% | 96.9 $\pm$ 0.0% | 48.5 $\pm$ 0.6% | 98.0 $\pm$ 0.0% | 91.2 $\pm$ 1.0% | 96.9 $\pm$ 0.0% | 87.8 $\pm$ 0.9% |
|                | 0.5         | 89.8 $\pm$ 0.5% | 73.8 $\pm$ 1.0% | 97.0 $\pm$ 0.1% | 60.5 $\pm$ 2.0% | 99.5 $\pm$ 0.0% | 97.6 $\pm$ 0.0% | 98.6 $\pm$ 0.0% | 96.7 $\pm$ 0.1% |
|                | 1.0         | 83.5 $\pm$ 0.2% | 58.7 $\pm$ 1.0% | 96.9 $\pm$ 0.1% | 63.3 $\pm$ 0.9% | 99.7 $\pm$ 0.0% | 97.6 $\pm$ 0.0% | 99.2 $\pm$ 0.0% | 96.8 $\pm$ 0.0% |
| 125            | 0.0         | 89.0 $\pm$ 0.1% | 67.0 $\pm$ 0.3% | 96.1 $\pm$ 0.1% | 81.8 $\pm$ 0.6% | 98.0 $\pm$ 0.0% | 91.2 $\pm$ 1.0% | 96.9 $\pm$ 0.0% | 87.8 $\pm$ 0.9% |
|                | 0.5         | 88.9 $\pm$ 0.1% | 68.5 $\pm$ 0.3% | 96.8 $\pm$ 0.0% | 80.6 $\pm$ 1.2% | 99.5 $\pm$ 0.0% | 97.6 $\pm$ 0.0% | 98.6 $\pm$ 0.0% | 96.7 $\pm$ 0.1% |
|                | 1.0         | 80.7 $\pm$ 0.2% | 64.6 $\pm$ 0.3% | 96.8 $\pm$ 0.0% | 79.4 $\pm$ 0.5% | 99.7 $\pm$ 0.0% | 97.6 $\pm$ 0.0% | 99.2 $\pm$ 0.0% | 96.8 $\pm$ 0.0% |
| 216            | 0.0         | 88.1 $\pm$ 0.1% | 77.9 $\pm$ 0.4% | 96.3 $\pm$ 0.0% | 90.0 $\pm$ 0.4% | 98.0 $\pm$ 0.0% | 91.2 $\pm$ 1.0% | 96.9 $\pm$ 0.0% | 87.8 $\pm$ 0.9% |
|                | 0.5         | 87.3 $\pm$ 0.0% | 77.7 $\pm$ 0.2% | 96.7 $\pm$ 0.0% | 91.4 $\pm$ 0.2% | 99.5 $\pm$ 0.0% | 97.6 $\pm$ 0.0% | 98.6 $\pm$ 0.0% | 96.7 $\pm$ 0.1% |
|                | 1.0         | 71.9 $\pm$ 0.2% | 57.3 $\pm$ 0.4% | 96.7 $\pm$ 0.0% | 92.4 $\pm$ 0.3% | 99.7 $\pm$ 0.0% | 97.6 $\pm$ 0.0% | 99.2 $\pm$ 0.0% | 96.8 $\pm$ 0.0% |

Table 5. Table displaying values to form Figure 5. Accuracy for all tasks in test-ID and test-OOD for different levels of *burstiness* over *color* for various numbers of colors. Limiting the number of colors available for each image during training allows the model to gain up to 14.8% more accuracy over the baseline. The *color* task, however, suffers up to 14.3% decline as the *color* task becomes easier to memorize.

| Num.<br>Colors | Jitter | Color           |                 | Shape           |                 | Size            |                 | Material        |                 |
|----------------|--------|-----------------|-----------------|-----------------|-----------------|-----------------|-----------------|-----------------|-----------------|
|                |        | Test-ID         | Test-OOD        | Test-ID         | Test-OOD        | Test-ID         | Test-OOD        | Test-ID         | Test-OOD        |
| 8              | 0.00   | 94.1 $\pm$ 0.1% | 50.5 $\pm$ 1.1% | 99.6 $\pm$ 0.0% | 0.6 $\pm$ 0.1%  | 98.0 $\pm$ 0.0% | 91.2 $\pm$ 1.0% | 96.9 $\pm$ 0.0% | 87.8 $\pm$ 0.9% |
|                | 0.05   | 94.1 $\pm$ 0.1% | 46.6 $\pm$ 0.4% | 99.6 $\pm$ 0.0% | 0.4 $\pm$ 0.0%  | 99.5 $\pm$ 0.0% | 97.6 $\pm$ 0.0% | 98.6 $\pm$ 0.0% | 96.7 $\pm$ 0.1% |
|                | 0.10   | 94.1 $\pm$ 0.1% | 48.0 $\pm$ 0.7% | 99.6 $\pm$ 0.0% | 0.9 $\pm$ 0.2%  | 99.7 $\pm$ 0.0% | 97.6 $\pm$ 0.0% | 99.2 $\pm$ 0.0% | 96.8 $\pm$ 0.0% |
|                | 0.50   | 93.9 $\pm$ 0.0% | 47.1 $\pm$ 0.4% | 99.7 $\pm$ 0.0% | 0.3 $\pm$ 0.1%  | 99.8 $\pm$ 0.0% | 97.8 $\pm$ 0.0% | 99.2 $\pm$ 0.0% | 96.9 $\pm$ 0.0% |
| 27             | 0.00   | 91.7 $\pm$ 0.0% | 67.5 $\pm$ 0.7% | 96.9 $\pm$ 0.1% | 1.5 $\pm$ 0.1%  | 98.0 $\pm$ 0.0% | 91.2 $\pm$ 1.0% | 96.9 $\pm$ 0.0% | 87.8 $\pm$ 0.9% |
|                | 0.05   | 91.9 $\pm$ 0.0% | 69.4 $\pm$ 1.5% | 97.4 $\pm$ 0.0% | 1.4 $\pm$ 0.2%  | 99.5 $\pm$ 0.0% | 97.6 $\pm$ 0.0% | 98.6 $\pm$ 0.0% | 96.7 $\pm$ 0.1% |
|                | 0.10   | 91.8 $\pm$ 0.1% | 68.4 $\pm$ 1.0% | 97.3 $\pm$ 0.1% | 1.7 $\pm$ 0.2%  | 99.7 $\pm$ 0.0% | 97.6 $\pm$ 0.0% | 99.2 $\pm$ 0.0% | 96.8 $\pm$ 0.0% |
|                | 0.50   | 91.9 $\pm$ 0.0% | 66.1 $\pm$ 2.0% | 97.2 $\pm$ 0.0% | 1.1 $\pm$ 0.2%  | 99.8 $\pm$ 0.0% | 97.8 $\pm$ 0.0% | 99.2 $\pm$ 0.0% | 96.9 $\pm$ 0.0% |
| 64             | 0.00   | 90.8 $\pm$ 0.1% | 73.0 $\pm$ 0.5% | 96.9 $\pm$ 0.0% | 48.5 $\pm$ 0.6% | 98.0 $\pm$ 0.0% | 91.2 $\pm$ 1.0% | 96.9 $\pm$ 0.0% | 87.8 $\pm$ 0.9% |
|                | 0.05   | 90.9 $\pm$ 0.0% | 68.5 $\pm$ 0.6% | 97.1 $\pm$ 0.0% | 57.1 $\pm$ 0.1% | 99.5 $\pm$ 0.0% | 97.6 $\pm$ 0.0% | 98.6 $\pm$ 0.0% | 96.7 $\pm$ 0.1% |
|                | 0.10   | 91.0 $\pm$ 0.0% | 67.1 $\pm$ 0.3% | 97.3 $\pm$ 0.0% | 62.3 $\pm$ 3.0% | 99.7 $\pm$ 0.0% | 97.6 $\pm$ 0.0% | 99.2 $\pm$ 0.0% | 96.8 $\pm$ 0.0% |
|                | 0.50   | 91.1 $\pm$ 0.0% | 68.6 $\pm$ 0.6% | 97.8 $\pm$ 0.0% | 63.8 $\pm$ 0.9% | 99.8 $\pm$ 0.0% | 97.8 $\pm$ 0.0% | 99.2 $\pm$ 0.0% | 96.9 $\pm$ 0.0% |
| 125            | 0.00   | 89.0 $\pm$ 0.1% | 67.0 $\pm$ 0.3% | 96.1 $\pm$ 0.1% | 81.8 $\pm$ 0.6% | 98.0 $\pm$ 0.0% | 91.2 $\pm$ 1.0% | 96.9 $\pm$ 0.0% | 87.8 $\pm$ 0.9% |
|                | 0.05   | 89.8 $\pm$ 0.0% | 71.1 $\pm$ 0.4% | 96.8 $\pm$ 0.1% | 85.0 $\pm$ 0.5% | 99.5 $\pm$ 0.0% | 97.6 $\pm$ 0.0% | 98.6 $\pm$ 0.0% | 96.7 $\pm$ 0.1% |
|                | 0.10   | 89.7 $\pm$ 0.1% | 68.4 $\pm$ 0.5% | 96.7 $\pm$ 0.1% | 79.2 $\pm$ 0.7% | 99.7 $\pm$ 0.0% | 97.6 $\pm$ 0.0% | 99.2 $\pm$ 0.0% | 96.8 $\pm$ 0.0% |
|                | 0.50   | 89.8 $\pm$ 0.1% | 70.6 $\pm$ 1.1% | 96.9 $\pm$ 0.0% | 85.8 $\pm$ 0.9% | 99.8 $\pm$ 0.0% | 97.8 $\pm$ 0.0% | 99.2 $\pm$ 0.0% | 96.9 $\pm$ 0.0% |
| 216            | 0.00   | 88.1 $\pm$ 0.1% | 77.9 $\pm$ 0.4% | 96.3 $\pm$ 0.0% | 90.0 $\pm$ 0.4% | 98.0 $\pm$ 0.0% | 91.2 $\pm$ 1.0% | 96.9 $\pm$ 0.0% | 87.8 $\pm$ 0.9% |
|                | 0.05   | 88.4 $\pm$ 0.0% | 79.8 $\pm$ 0.3% | 96.8 $\pm$ 0.1% | 92.2 $\pm$ 0.1% | 99.5 $\pm$ 0.0% | 97.6 $\pm$ 0.0% | 98.6 $\pm$ 0.0% | 96.7 $\pm$ 0.1% |
|                | 0.10   | 88.0 $\pm$ 0.1% | 75.6 $\pm$ 0.2% | 96.4 $\pm$ 0.1% | 91.0 $\pm$ 0.3% | 99.7 $\pm$ 0.0% | 97.6 $\pm$ 0.0% | 99.2 $\pm$ 0.0% | 96.8 $\pm$ 0.0% |
|                | 0.50   | 88.4 $\pm$ 0.1% | 78.7 $\pm$ 0.7% | 96.7 $\pm$ 0.1% | 92.0 $\pm$ 0.1% | 99.8 $\pm$ 0.0% | 97.8 $\pm$ 0.0% | 99.2 $\pm$ 0.0% | 96.9 $\pm$ 0.0% |

Table 6. Table displaying values to form Figure 6. Accuracy after applying latent intervention for all tasks in test-ID and test-OOD for different levels of latent intervention of the *color* latent attribute for various numbers of colors. Altering the color hue randomly during training allows the model to gain up to 15% more OOD accuracy over the baseline.

| Num.<br>Colors | Hidden<br>Size | Color           |                 | Shape           |                 | Size            |                 | Material        |                 |
|----------------|----------------|-----------------|-----------------|-----------------|-----------------|-----------------|-----------------|-----------------|-----------------|
|                |                | Test-ID         | Test-OOD        | Test-ID         | Test-OOD        | Test-ID         | Test-OOD        | Test-ID         | Test-OOD        |
| 8              | 32             | 79.3 $\pm$ 0.1% | 4.6 $\pm$ 0.6%  | 90.8 $\pm$ 0.8% | 0.0 $\pm$ 0.0%  | 98.0 $\pm$ 0.0% | 91.2 $\pm$ 1.0% | 96.9 $\pm$ 0.0% | 87.8 $\pm$ 0.9% |
|                | 64             | 87.0 $\pm$ 1.6% | 18.1 $\pm$ 1.9% | 98.1 $\pm$ 0.4% | 0.0 $\pm$ 0.0%  | 99.5 $\pm$ 0.0% | 97.6 $\pm$ 0.0% | 98.6 $\pm$ 0.0% | 96.7 $\pm$ 0.1% |
|                | 128            | 93.8 $\pm$ 0.1% | 43.9 $\pm$ 0.7% | 99.5 $\pm$ 0.0% | 0.2 $\pm$ 0.0%  | 99.7 $\pm$ 0.0% | 97.6 $\pm$ 0.0% | 99.2 $\pm$ 0.0% | 96.8 $\pm$ 0.0% |
|                | 256            | 94.1 $\pm$ 0.1% | 50.5 $\pm$ 1.1% | 99.6 $\pm$ 0.0% | 0.6 $\pm$ 0.1%  | 99.8 $\pm$ 0.0% | 97.8 $\pm$ 0.0% | 99.2 $\pm$ 0.0% | 96.9 $\pm$ 0.0% |
| 216            | 256            | 88.1 $\pm$ 0.1% | 77.9 $\pm$ 0.4% | 96.3 $\pm$ 0.0% | 90.0 $\pm$ 0.4% | 98.0 $\pm$ 0.0% | 91.2 $\pm$ 1.0% | 96.9 $\pm$ 0.0% | 87.8 $\pm$ 0.9% |
|                | 512            | 88.8 $\pm$ 0.0% | 81.6 $\pm$ 0.2% | 97.3 $\pm$ 0.0% | 93.5 $\pm$ 0.1% | 99.5 $\pm$ 0.0% | 97.6 $\pm$ 0.0% | 98.6 $\pm$ 0.0% | 96.7 $\pm$ 0.1% |
|                | 1024           | 89.1 $\pm$ 0.1% | 82.2 $\pm$ 0.1% | 97.6 $\pm$ 0.0% | 92.4 $\pm$ 0.2% | 99.7 $\pm$ 0.0% | 97.6 $\pm$ 0.0% | 99.2 $\pm$ 0.0% | 96.8 $\pm$ 0.0% |

Table 7. Table displaying values to form Figure 7. ID and OOD accuracy for models trained with different values for their hidden dimensions on a training set with 8 and 216 colors for all tasks.
